# Supplementary material
Source: PubMed Central journal article supplement (PMC9132135)
Supplement: NIHMS1778495-supplement-supinfo.pdf [file NIHMS1778495-supplement-supinfo.pdf]

## Supplementary Materials

**Fig S1.** PECAM-1 and SMA expression in intimal fraction (A), and PECAM-1 expression in intimal fraction (EC) and media/adventitia (B). (A) and insulin tolerance test (B) in *db/+*, *db/db* and *db/db+BB* mice. Values are mean  $\pm$  SEM (n=5-6). Labelled column without a common letter differ,  $P < 0.05$ . *db/+*, Control mice fed a standard diet; *db/db*, diabetic mice fed a standard diet; *db/db+BB*, diabetic mice fed a blueberry supplemented diet; ECs, endothelial cells; PECAM-1, platelet endothelial cell adhesion molecule-1; SMA, smooth muscle actin.

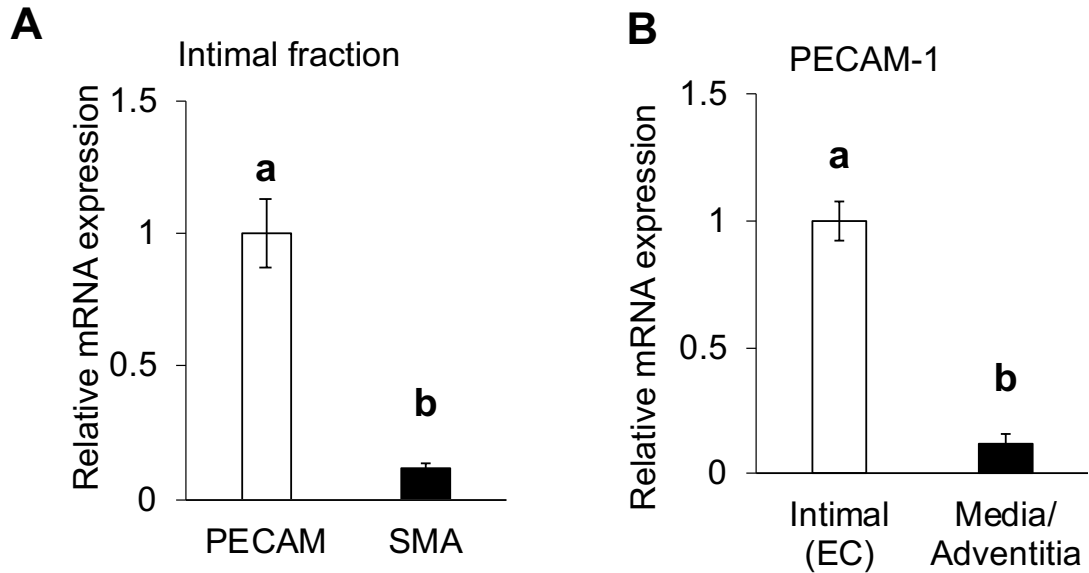

**Fig S2.** Body weight, n=16-20 (A); food intake, n=16-20 (B); fasting blood glucose, n=7-10 (C); non-fasting blood glucose, n=7-10 (D); serum cholesterol, n=5-8 (E); and serum triglycerides, n=5-8 in *db/+*, *db/db* and *db/db+BB* mice. Values are mean  $\pm$  SEM. Columns without a common letter differ,  $P < 0.05$ . *db/+*, Control mice fed a standard diet; *db/db*, diabetic mice fed a standard diet; *db/db+BB*, diabetic mice fed a blueberry supplemented diet.

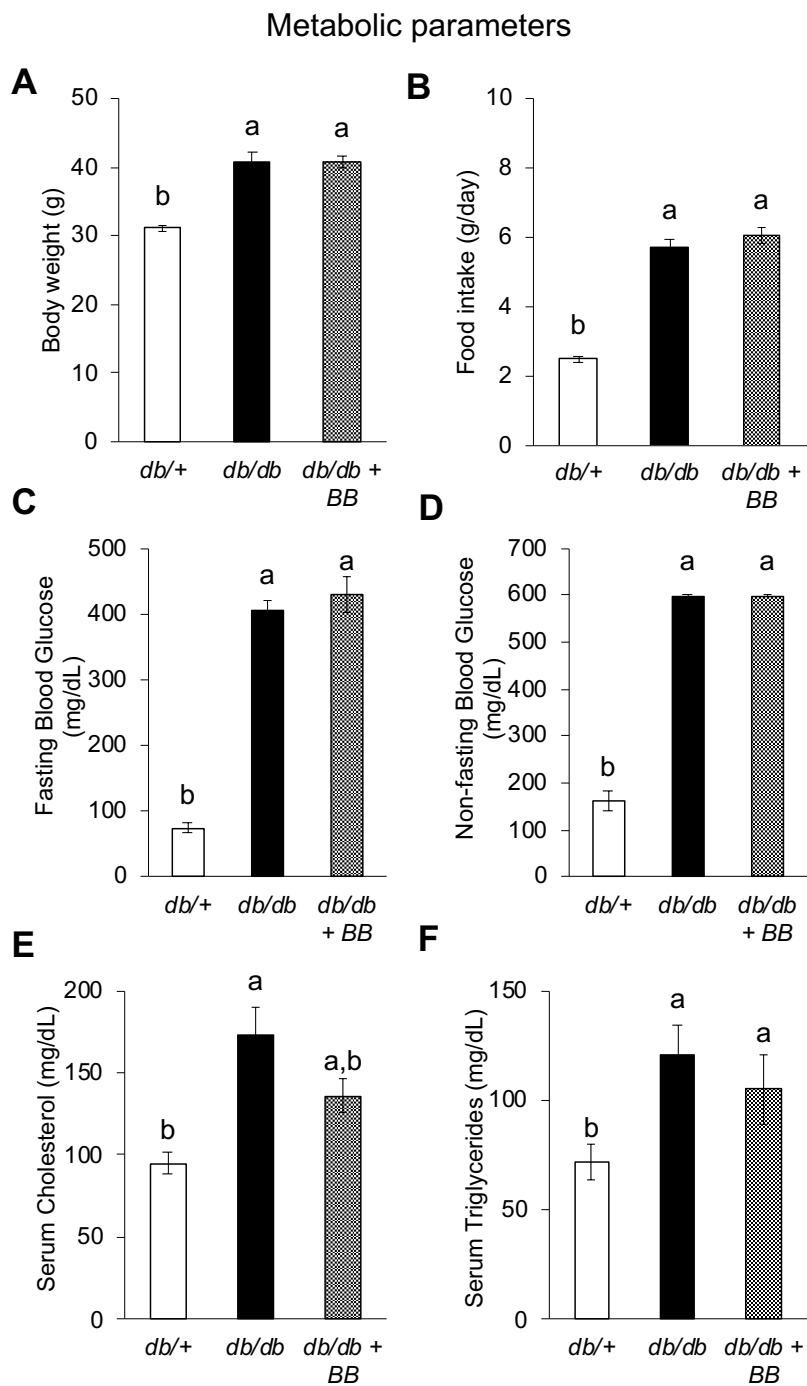

**Fig S3.** Glucose tolerance test (A) and insulin tolerance test (B) in *db/+*, *db/db* and *db/db+BB* mice. Values are mean  $\pm$  SEM (n=7-9). Labelled means without a common letter differ,  $P < 0.05$ . *db/+*, Control mice fed a standard diet; *db/db*, diabetic mice fed a standard diet; *db/db+BB*, diabetic mice fed a blueberry supplemented diet.

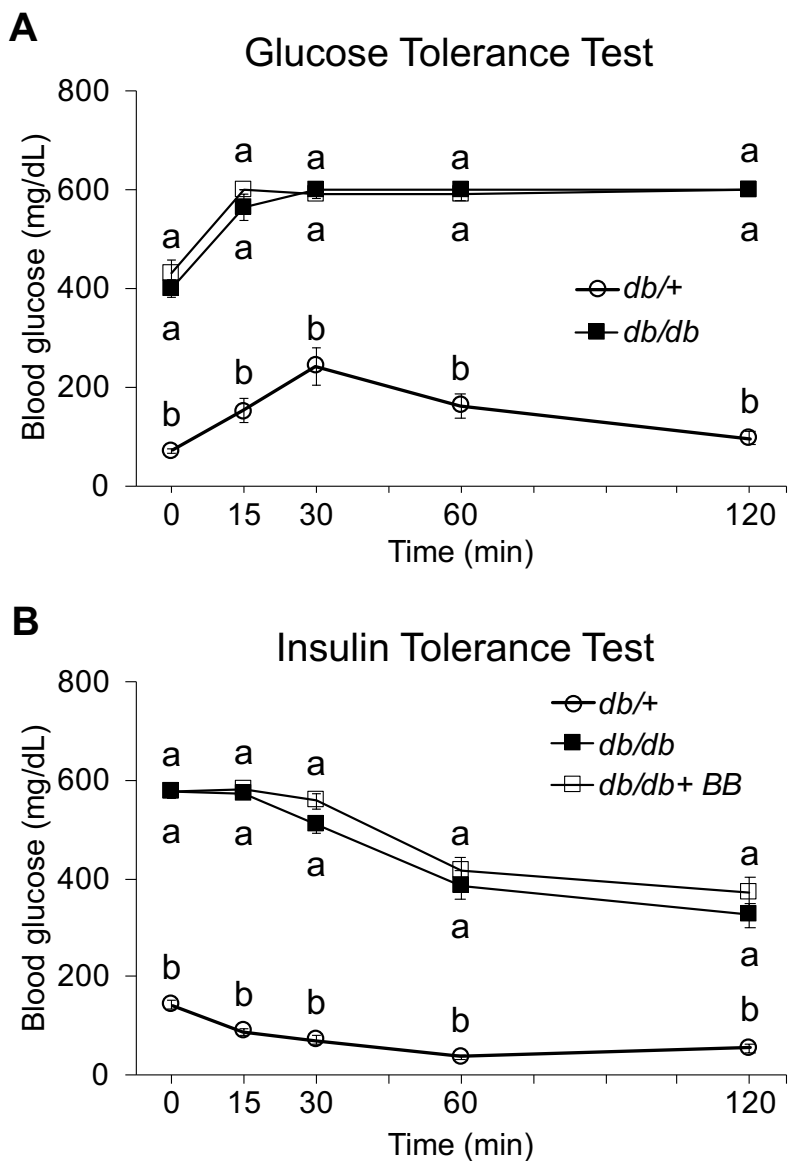

**Fig S4.** Rarefaction curve for *db/+*, *db/db* and *db/db+BB* mice (n=8). *db/+*, Control mice fed a standard diet; *db/db*, diabetic mice fed a standard diet; *db/db+BB*, diabetic mice fed a blueberry supplemented diet.

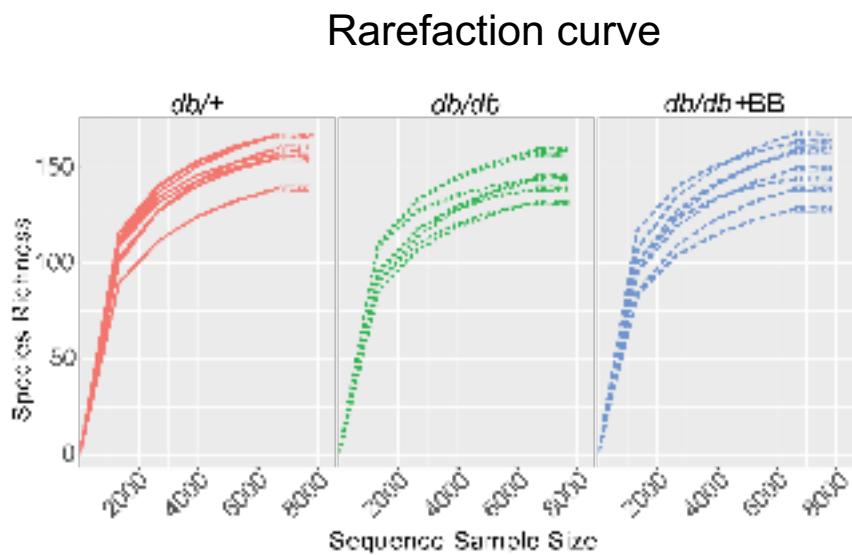

**Supplementary Table.** Standard diet and blueberry-supplemented diet formulation (Dyets Inc.)

| Ingredient             | Standard diet<br>(g/kg) | Standard diet<br>(kcal/g) | Blueberry<br>supplemented<br>diet<br>(g/kg) | Blueberry<br>supplemented<br>diet<br>(kcal/g) |
|------------------------|-------------------------|---------------------------|---------------------------------------------|-----------------------------------------------|
| Casein, High Nitrogen  | 200                     | 716                       | 200                                         | 716                                           |
| L-Cystine              | 3                       | 12                        | 3                                           | 12                                            |
| Sucrose                | 89                      | 356                       | 75                                          | 300                                           |
| Cornstarch             | 397.5                   | 1431                      | 389.5                                       | 1402                                          |
| Dyetrose               | 132                     | 501.6                     | 132                                         | 501.6                                         |
| Corn Oil               | 70                      | 630                       | 70                                          | 630                                           |
| Cellulose              | 50                      | 0                         | 45                                          | 0                                             |
| Mineral Mix #210021    | 35                      | 30.8                      | 35                                          | 30.8                                          |
| Vitamin Mix #310025    | 10                      | 38.7                      | 10                                          | 38.7                                          |
| Choline Bitartrate     | 2.5                     | 0                         | 2.5                                         | 0                                             |
| Dextrose               | 5                       | 20                        | 0                                           | 0                                             |
| Fructose               | 6                       | 24                        | 0                                           | 0                                             |
| Freeze-Dried blueberry | 0                       | 0                         | 38                                          | 152                                           |
